# Supplementary material for: Novel luminescent and electrochromic polyhydrazides and polyoxadiazoles bearing pyrenylamine moieties
Source: Royal Society of Chemistry journal article supplement (doi:10.1039/c1py00115a), 2011-01-01
Supplement: c1py00115a.pdf [file c1py00115a.pdf]

## Supplementary Information

for

### Novel luminescent and electrochromic polyhydrazides and polyoxadiazoles bearing pyrenylamine moieties

by

Yi-Chun Kung<sup>a</sup> and Sheng-Huei Hsiao\*<sup>b</sup>

<sup>a</sup> Department of Chemical Engineering, Tatung University, Taipei, 10452, Taiwan

<sup>b</sup> Department of Chemical Engineering and Biotechnology, National Taipei University of Technology,  
Taipei, 10608, Taiwan

#### Table of Contents

|                                                                                                                                                                                                                                                                              |   |
|------------------------------------------------------------------------------------------------------------------------------------------------------------------------------------------------------------------------------------------------------------------------------|---|
| Synthetic details for <i>N,N</i> -di(4-cyanophenyl)-1-aminopyrene and<br><i>N,N</i> -di(4-carboxyphenyl)-1-aminopyrene .....                                                                                                                                                 | 2 |
| <b>Fig. S1</b> (a) <sup>1</sup> H, (b) <sup>13</sup> C, (c) H-H COSY and (d) C-H HMQC NMR spectra of<br><i>N,N</i> -di(4-cyanophenyl)-1-aminopyrene in DMSO- <i>d</i> <sub>6</sub> .....                                                                                     | 3 |
| <b>Fig. S2</b> (a) <sup>1</sup> H and (b) <sup>13</sup> C, (c) H-H COSY and (d) C-H HMQC NMR spectra of<br><i>N,N</i> -di(4-carboxyphenyl)-1-aminopyrene in DMSO- <i>d</i> <sub>6</sub> .....                                                                                | 4 |
| <b>Fig. S3</b> IR spectra of polyhydrazide <b>I-IPH</b> and poly(1,3,4-oxadiazole) <b>II-IPH</b> .....                                                                                                                                                                       | 4 |
| <b>Fig. S4</b> DSC traces of polyhydrazide <b>I-TPH</b> and poly(1,3,4-oxadiazole) <b>II-TPH</b> with<br>a heating rate of 20 °C/ min in nitrogen.....                                                                                                                       | 5 |
| <b>Fig. S5</b> TGA curves of polyhydrazide <b>I-TPH</b> and poly(1,3,4-oxadiazole) <b>II-TPH</b><br>with a heating rate of 20 °C/ min in nitrogen.....                                                                                                                       | 5 |
| <b>Fig. S6</b> Cyclic voltammograms of individual reacting compounds (~10 <sup>-3</sup> M) in<br>CH <sub>3</sub> CN (for oxidation) and DMF (for reduction) solutions containing 0.1 M<br>Bu <sub>4</sub> NClO <sub>4</sub> at a Pt coil electrode, scan rate = 50 mV/s..... | 6 |
| <b>Table S1</b> Elemental analysis of the polyoxadiazoles.....                                                                                                                                                                                                               | 6 |

**Synthesis of *N,N*-Di(4-cyanophenyl)-1-aminopyrene.** To a solution of 15.20 g (70 mmol) of

1-aminopyrene and 17.56 g (145 mmol) of 4-fluorobenzonitrile in 100 mL of dried dimethyl sulfoxide (DMSO), 22.79 g (150 mmol) of dried CsF was added with stirring all at once, and the mixture was heated at 170 °C for 18 h under nitrogen atmosphere. The mixture was poured into 1 L of water/methanol (1:1). The precipitated compound was collected by filtration and washed thoroughly by methanol and hot water. The crude product was filtered and recrystallized from acetic acid/water to afford 20.55 g (70 % in yield) of pale brown needles with an mp of 241-242 °C (by DSC at a heating rate of 5 °C/min). FT-IR (KBr): 2218 cm<sup>-1</sup> (C≡N stretch). <sup>1</sup>H NMR (500 MHz, DMSO-*d*<sub>6</sub>, δ, ppm): 7.16 (d, *J* = 8.8 Hz, 4H, H<sub>j</sub>), 7.70 (d, *J* = 8.8 Hz, 4H, H<sub>k</sub>), 7.82 (d, *J* = 9.2 Hz, 1H, H<sub>a</sub>), 7.98 (d, *J* = 8.2 Hz, 1H, H<sub>d</sub>), 8.13 (t, *J* = 7.7 Hz, 1H, H<sub>f</sub>), 8.18 (d, *J* = 9.3 Hz, 1H, H<sub>b</sub>), 8.27 (d, *J* = 9.0 Hz, 1H, H<sub>i</sub>), 8.30 (d, *J* = 9.0 Hz, 1H, H<sub>h</sub>), 8.31 (d, *J* = 7.2 Hz, 1H, H<sub>c</sub>), 8.39 (d, *J* = 7.6 Hz, 1H, H<sub>g</sub>), 8.44 (d, *J* = 8.2 Hz, 1H, H<sub>c</sub>). <sup>13</sup>C NMR (125 MHz, DMSO-*d*<sub>6</sub>, δ, ppm): 104.19 (C<sup>20</sup>), 118.94 (C≡N), 121.57 (C<sup>18</sup> + C<sup>2</sup>), 123.72 (C<sup>4</sup>), 125.41 (C<sup>14</sup>), 125.84 (C<sup>8</sup>), 126.12 (C<sup>10</sup>), 126.71 (C<sup>5</sup>), 126.90 (C<sup>9</sup>), 127.13 (C<sup>13</sup>), 127.75 (C<sup>15</sup>), 127.90 (C<sup>6</sup>), 128.08 (C<sup>12</sup>), 129.22 (C<sup>3</sup>), 130.28 (C<sup>16</sup>), 130.54 (C<sup>11</sup>), 130.57 (C<sup>7</sup>), 133.81 (C<sup>19</sup>), 137.19 (C<sup>1</sup>), 150.13 (C<sup>17</sup>). Anal. Calcd (%) for C<sub>30</sub>H<sub>17</sub>N<sub>3</sub> (419.48): C, 85.90 %; H, 4.08 %; N, 10.02 %. Found: C, 85.77 %; H, 4.12%; N, 10.11 %.

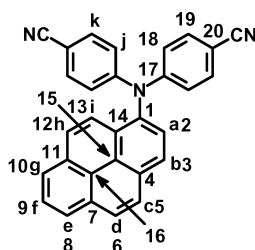

**Synthesis of *N,N*-Di(4-carboxyphenyl)-1-aminopyrene.** A mixture of 5.35 g (95 mmol) of potassium hydroxide and 4.00 g (9.5 mmol) of the obtained dinitrile compound **1** in 30 mL of ethanol and 40 mL of distilled water was stirred at 110 °C until no further ammonia was generated. The time taken to reach this stage was about 4 days. The solution was filtered while hot and cooled to room temperature, and the pH value of filtrate was adjusted by 3 M hydrochloric acid (HCl) to near 3. The yellow precipitate was filtered, washed thoroughly with water and recrystallized from acetic acid/water to afford 3.86 g (88.5 % in yield) of pale yellow needles with a mp of 312-314 °C (by DSC at 5 °C/min). FT-IR (KBr): 2700-3200 cm<sup>-1</sup> (O-H stretch), 1682 cm<sup>-1</sup> (C=O stretch). <sup>1</sup>H NMR (500 MHz, DMSO-*d*<sub>6</sub>, δ, ppm): 7.11 (d, *J* = 8.8 Hz, 4H, H<sub>j</sub>), 7.86 (d, *J* = 8.8 Hz, 4H, H<sub>k</sub>), 7.96 (d, *J* = 8.1 Hz, 1H, H<sub>a</sub>), 7.99 (d, *J* = 9.3 Hz, 1H, H<sub>d</sub>), 8.11 (t, *J* = 7.6 Hz, 1H, H<sub>f</sub>), 8.15 (d, *J* = 9.3 Hz, 1H, H<sub>b</sub>), 8.25 (d, *J* = 9.1 Hz, 1H, H<sub>i</sub>), 8.27 (d, *J* = 9.1 Hz, 1H, H<sub>h</sub>), 8.28 (d, *J* = 7.5 Hz, 1H, H<sub>c</sub>), 8.37 (d, *J* = 7.6 Hz, 1H, H<sub>g</sub>),

8.43 (d,  $J = 8.2$  Hz, 1H, H<sub>b</sub>).  $^{13}\text{C}$  NMR (125 MHz, DMSO- $d_6$ ,  $\delta$ , ppm): 120.82 (C<sup>18</sup>), 121.96 (C<sup>6</sup>), 123.82 (C<sup>4</sup>), 124.20 (C<sup>20</sup>), 125.47 (C<sup>14</sup>), 125.64 (C<sup>8</sup>), 125.91 (C<sup>10</sup>), 126.64 (C<sup>3</sup>), 126.80 (C<sup>9</sup>), 127.18 (C<sup>13</sup>), 127.74 (C<sup>12</sup>), 127.76 (C<sup>15</sup>), 127.92 (C<sup>2</sup>), 128.80 (C<sup>5</sup>), 130.13 (C<sup>16</sup>), 130.34 (C<sup>11</sup>), 130.63 (C<sup>7</sup>), 131.06 (C<sup>19</sup>), 138.41 (C<sup>1</sup>), 150.73 (C<sup>17</sup>), 166.79 (C=O). Anal. Calcd (%) for C<sub>30</sub>H<sub>19</sub>NO<sub>4</sub> (457.48): C, 78.76 %; H, 4.19 %; N, 3.06 %. Found: C, 77.82 %; H, 4.23 %; N, 3.09 %.

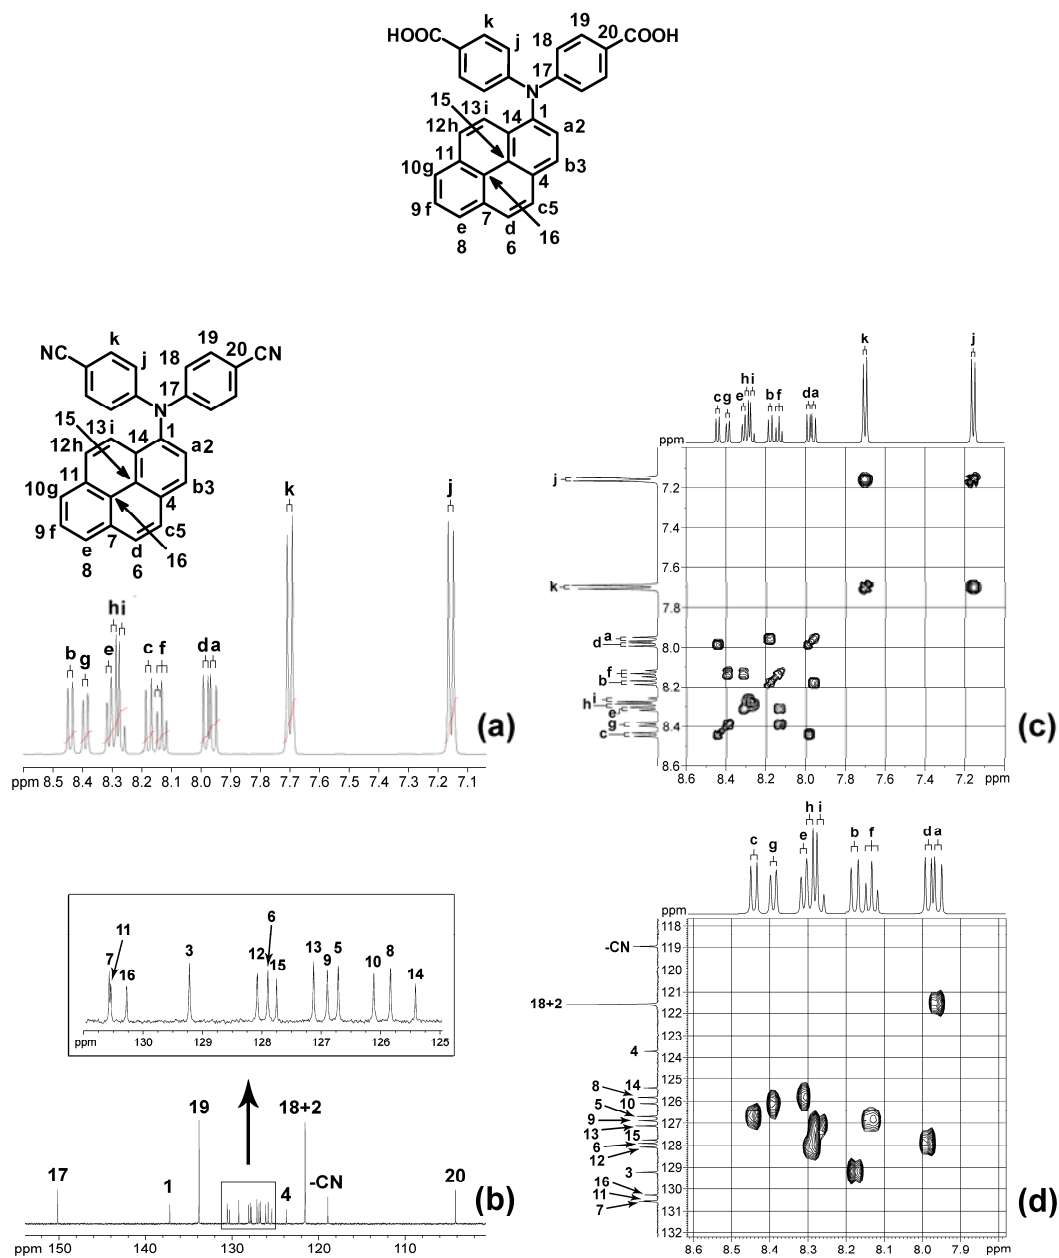

**Fig. S1** (a)  $^1\text{H}$ , (b)  $^{13}\text{C}$ , (c) H-H COSY and (d) C-H HMQC NMR spectra of *N,N*-di(4-cyanophenyl)-1-aminopyrene in DMSO- $d_6$ .

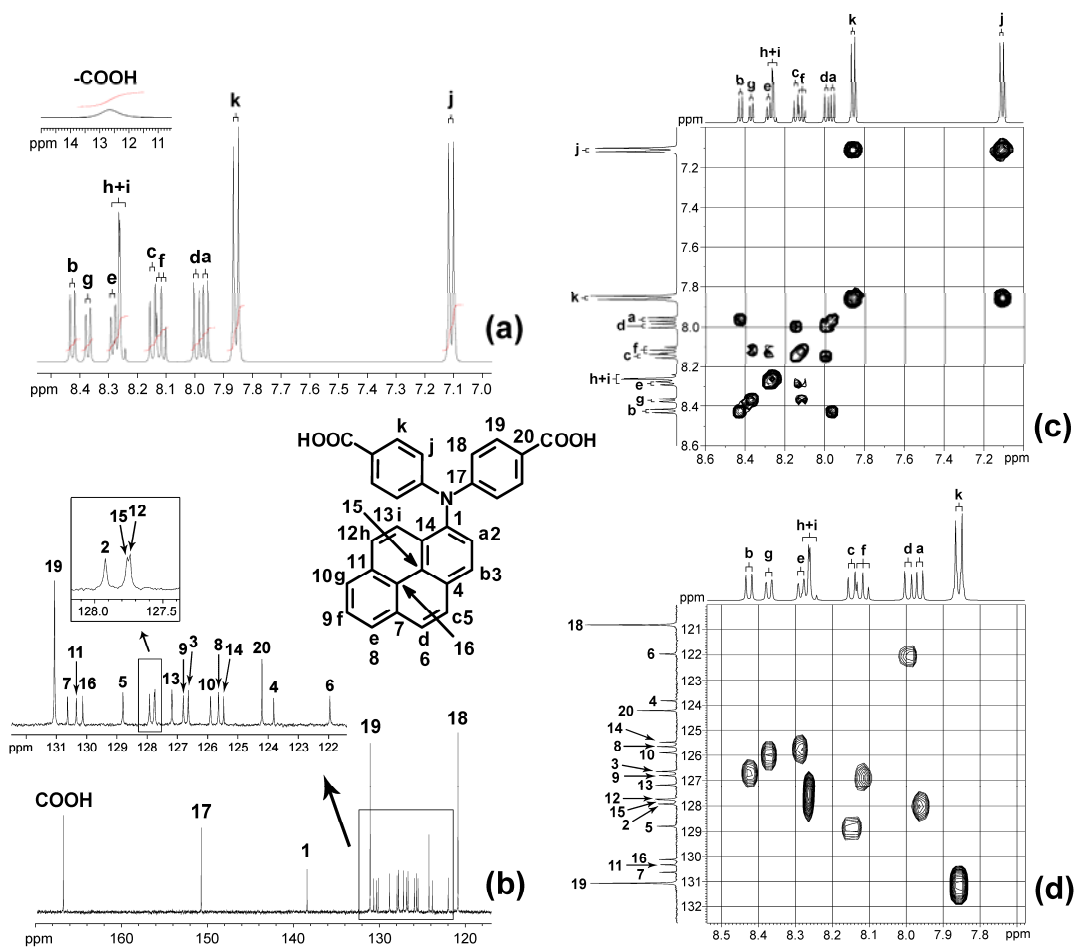

**Fig. S2** (a)  $^1\text{H}$  and (b)  $^{13}\text{C}$ , (c) H-H COSY and (d) C-H HMQC NMR spectra of *N,N*-di(4-carboxyphenyl)-1-aminopyrene in  $\text{DMSO-}d_6$ .

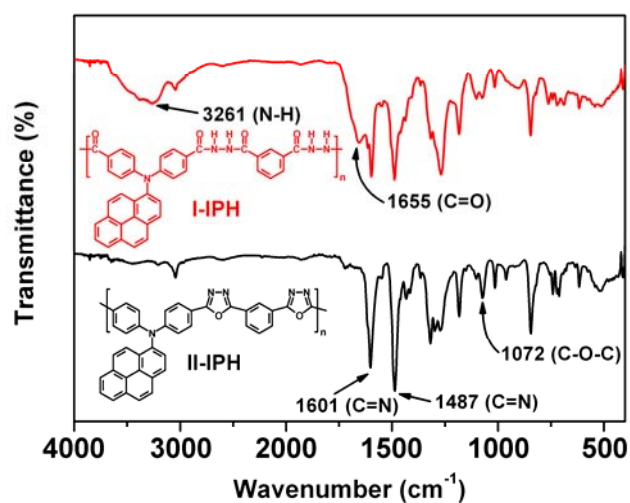

**Fig. S3** IR spectra of polyhydrazone **I-IPH** and poly(1,3,4-oxadiazole) **II-IPH**.

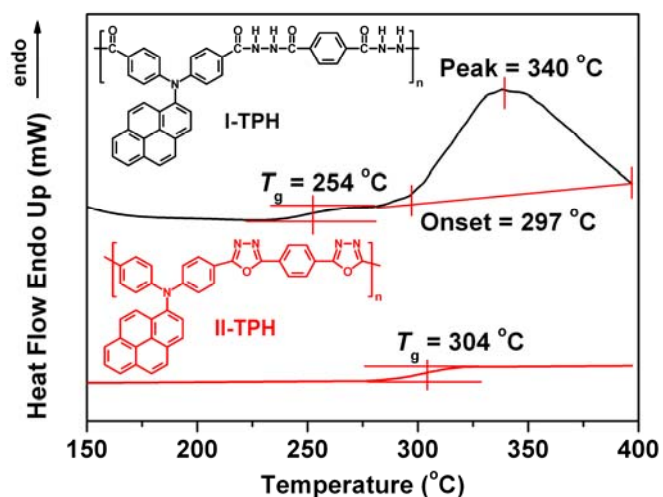

**Fig. S4** DSC traces of polyhydrazide **I-TPH** and poly(1,3,4-oxadiazole) **II-TPH** with a heating rate of  $20\text{ °C}/\text{min}$  in nitrogen.

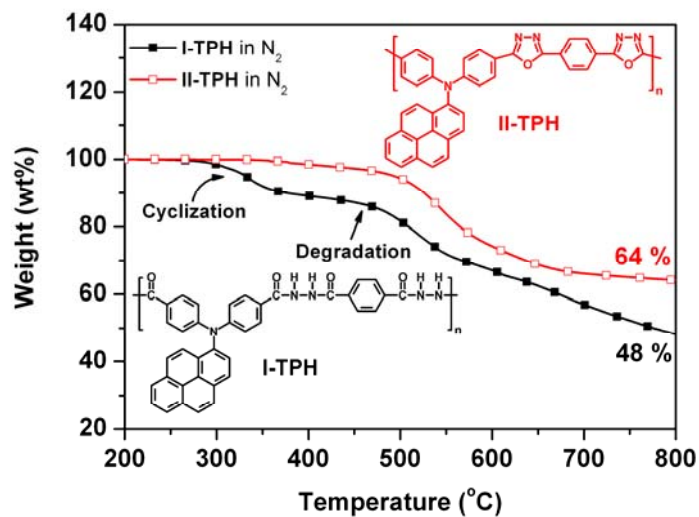

**Fig. S5** TGA curves of polyhydrazide **I-TPH** and poly(1,3,4-oxadiazole) **II-TPH** with a heating rate of  $20\text{ °C}/\text{min}$  in nitrogen.

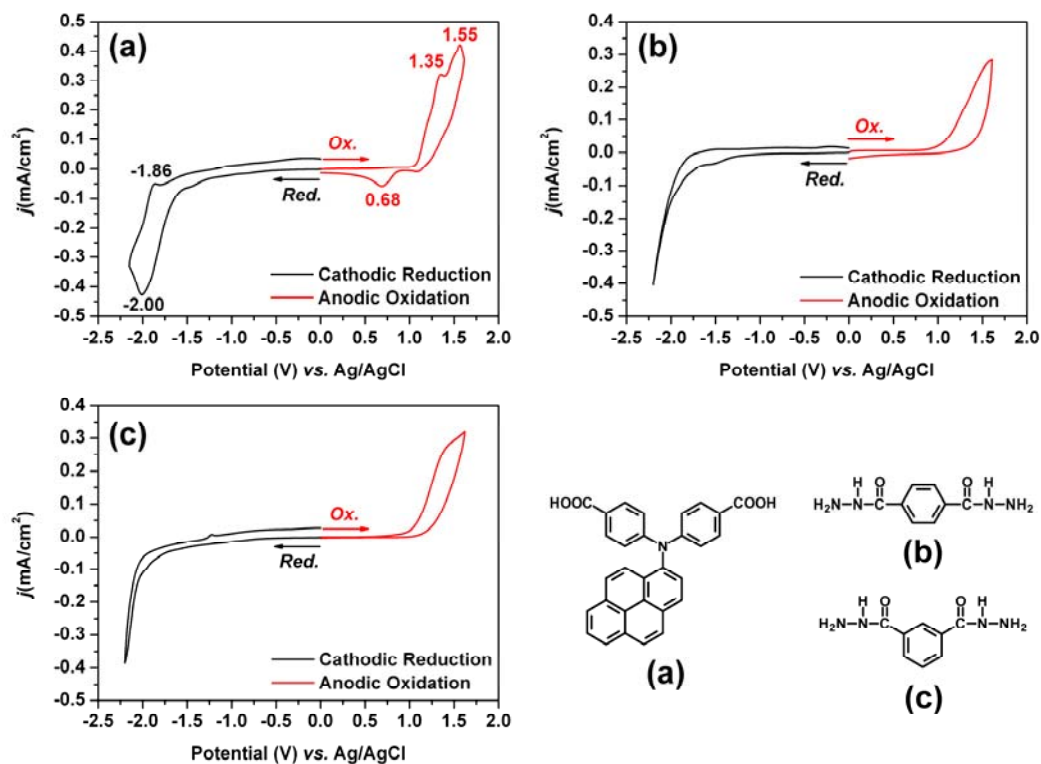

**Fig. S6** Cyclic voltammograms of individual reacting compounds ( $\sim 10^{-3}$  M) in CH<sub>3</sub>CN (for oxidation) and DMF (for reduction) solutions containing 0.1 M Bu<sub>4</sub>NClO<sub>4</sub> at a Pt coil electrode, scan rate = 50 mV/s.

**Table S1** Elemental analysis of the polyoxadiazoles

| Polymer Code  | Elemental Analyses of Polymers                                                |        |       |       |       |
|---------------|-------------------------------------------------------------------------------|--------|-------|-------|-------|
|               | Formula Weight                                                                |        | C (%) | H (%) | N (%) |
| <b>II-TPH</b> | (C <sub>38</sub> H <sub>21</sub> N <sub>5</sub> O <sub>2</sub> ) <sub>n</sub> | Calcd. | 78.74 | 3.65  | 12.08 |
|               | (579.63) <sub>n</sub>                                                         | Found  | 78.61 | 3.57  | 11.89 |
| <b>II-IPH</b> | (C <sub>38</sub> H <sub>21</sub> N <sub>5</sub> O <sub>2</sub> ) <sub>n</sub> | Calcd. | 78.74 | 3.65  | 12.08 |
|               | (579.63) <sub>n</sub>                                                         | Found  | 78.59 | 3.53  | 11.92 |
